# Supplementary material for: Understanding the suppressive role of catalytically active Pt–TiO2 interfacial sites of supported metal catalysts towards complete oxidation of toluene
Source: Royal Society of Chemistry journal article supplement (doi:10.1039/d2ta07555e), 2022-01-01
Supplement: d2ta07555e1.pdf [file d2ta07555e1.pdf]

**This ESI replaces the original version published on 10 November 2022**

## Supplementary Material

### **New insight into catalytic toluene oxidation at Pt-TiO<sub>2</sub> interface: interfacial oxygen species inducing carbon deposition via dehydrogenation**

Hanlei Sun,<sup>[a]</sup> Peipei Zhang,<sup>[a]</sup> Jiexiang Wang,<sup>[a]</sup> Songshou Ye,<sup>[a]</sup> Jile Fu,<sup>\*[a,b]</sup> Jinbao Zheng,<sup>[a]</sup> Hua Zhang,<sup>\*[a]</sup> Nuowei Zhang,<sup>[a]</sup> and Binghui Chen<sup>\*[a,b]</sup>

[a] H. L. Sun, P. P. Zhang, Dr. J. X. Wang, Dr. S. S. Ye, Dr. J. L. Fu, Dr. J. B. Zheng, Dr. Hua. Zhang, N. W. Zhang, Prof. B. H. Chen  
College of Chemistry and Chemical Engineering, College of Materials, Xiamen University  
Xiamen 361005, China  
E-mail: chenbh@xmu.edu.cn (B. Chen)  
huazhang@xmu.edu.cn (H. Zhang)

[b] Dr. J. L. Fu  
School of Energy and Chemical Engineering, Xiamen University (Malaysia Campus),  
Jalan Sunsuria, Bandar Sunsuria, 43900, Sepang, Malaysia  
E-mail: hqfjl1314@163.com (J. Fu)

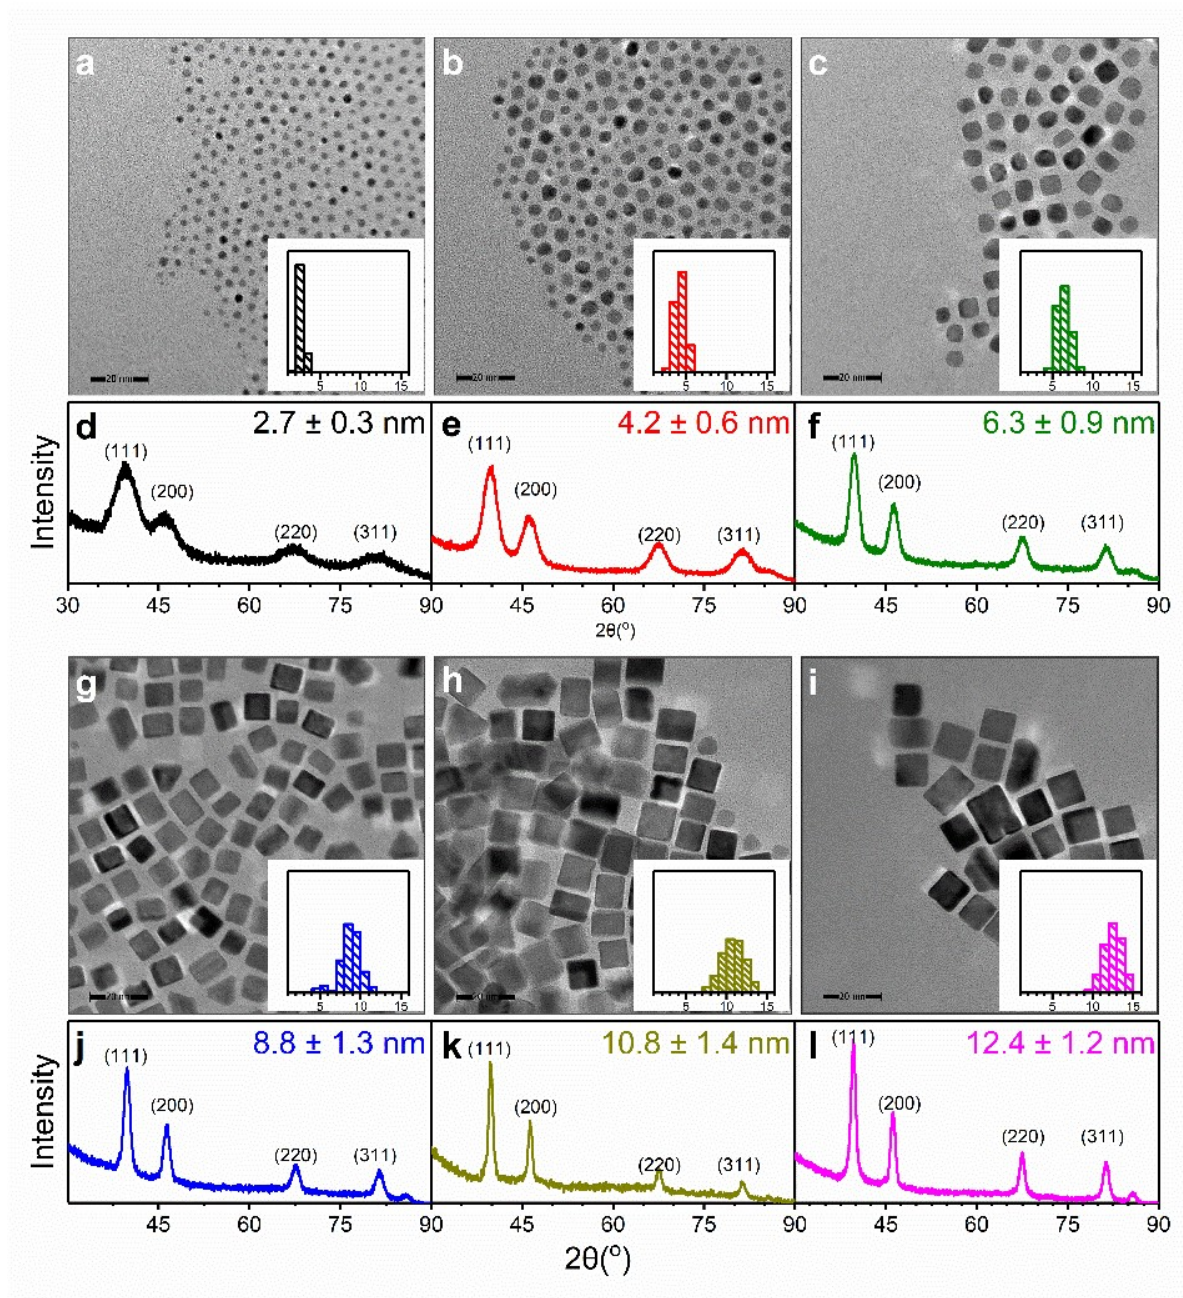

**Fig. S1.** Representative (a-c) (g-i) TEM images, and (d-f) (j-l) XRD patterns for Pt NPs with different size.

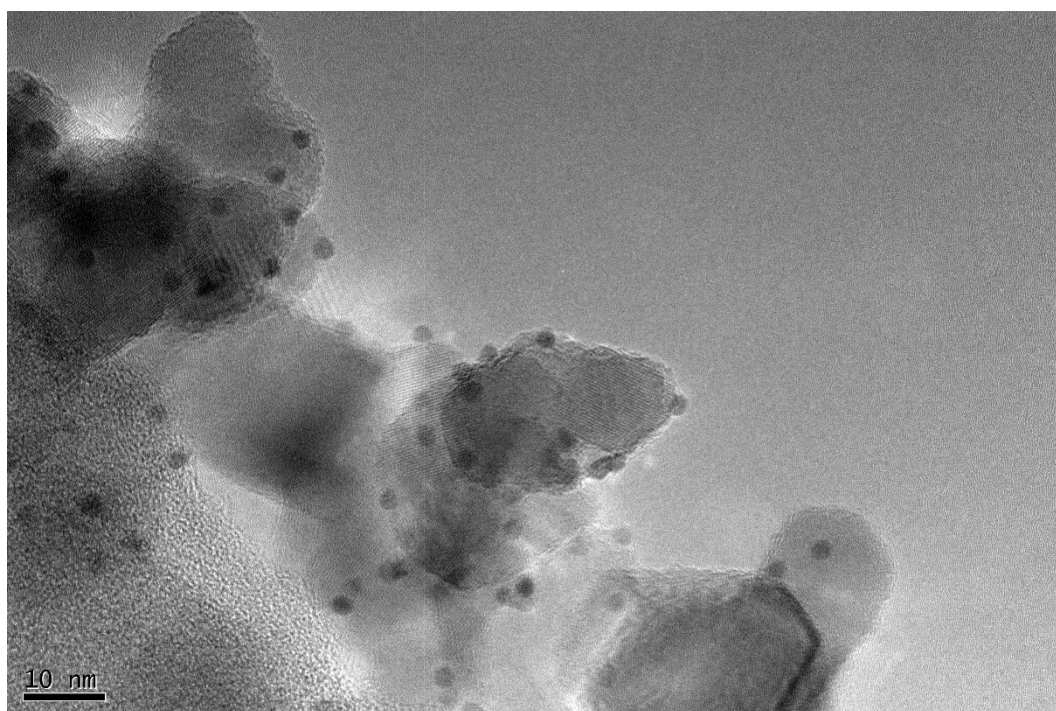

**Fig. S2.** TEM image of the Pt/TiO<sub>2</sub>-2.7 nm.

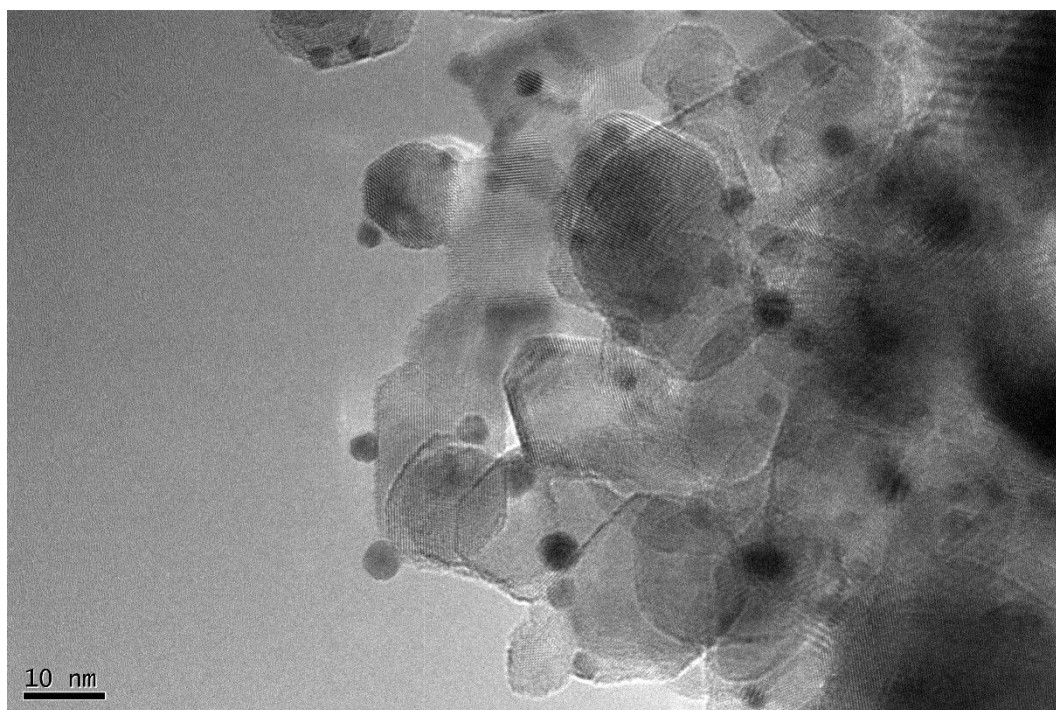

**Fig. S3.** TEM image of the Pt/TiO<sub>2</sub>-4.2 nm.

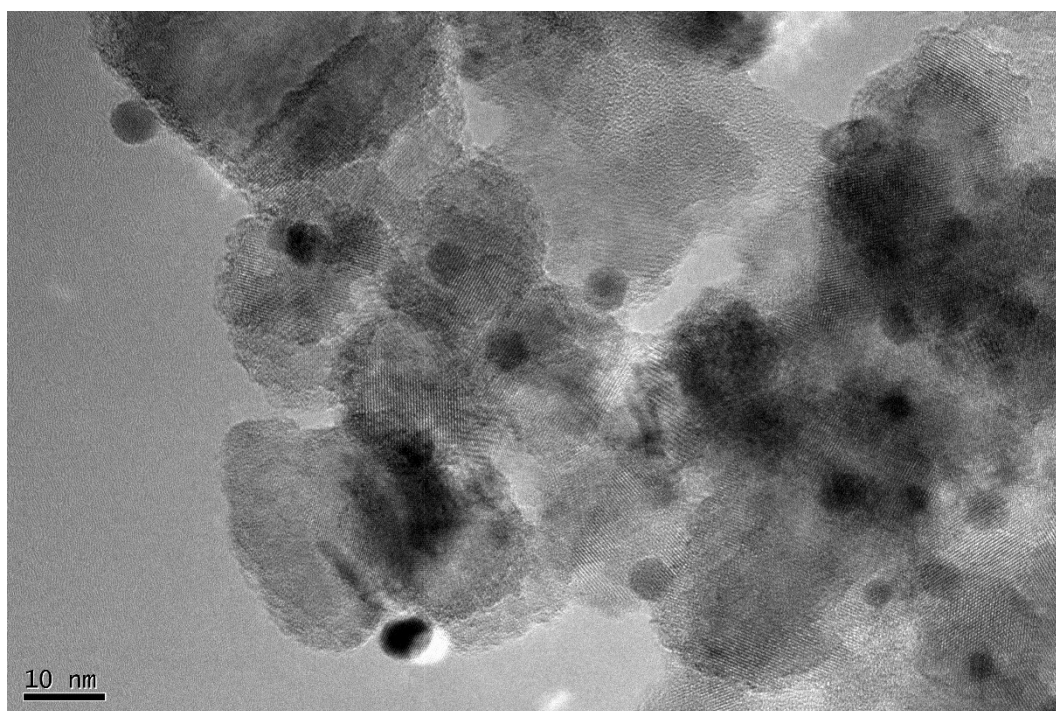

**Fig. S4.** TEM image of the Pt/TiO<sub>2</sub>-6.3 nm.

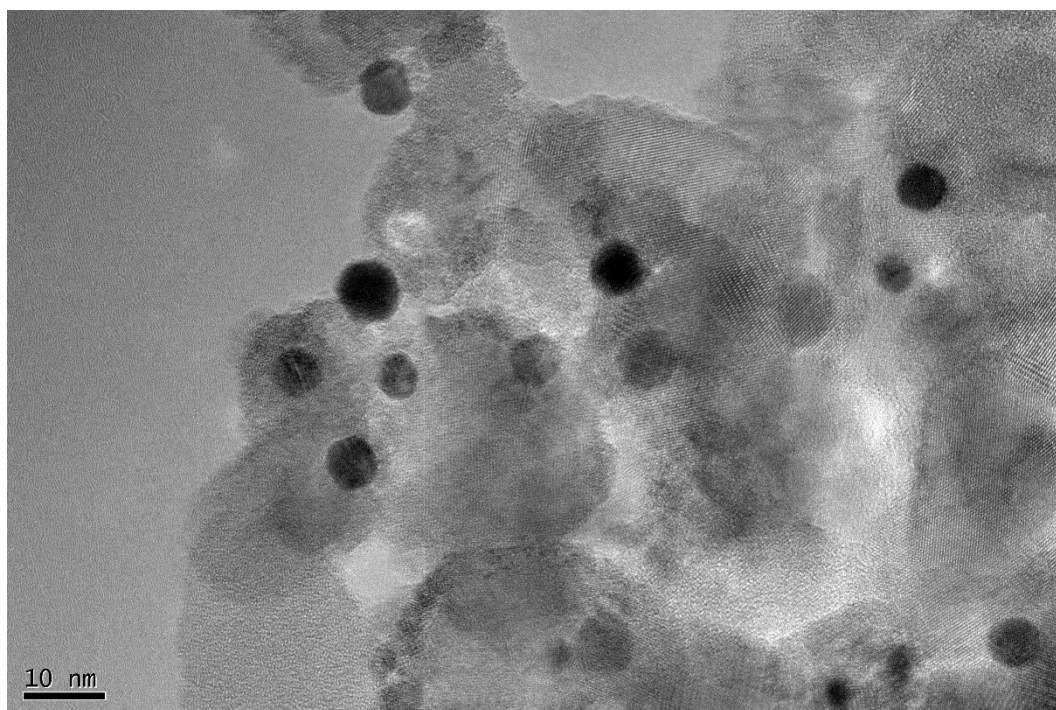

**Fig. S5.** TEM image of the Pt/TiO<sub>2</sub>-8.8 nm.

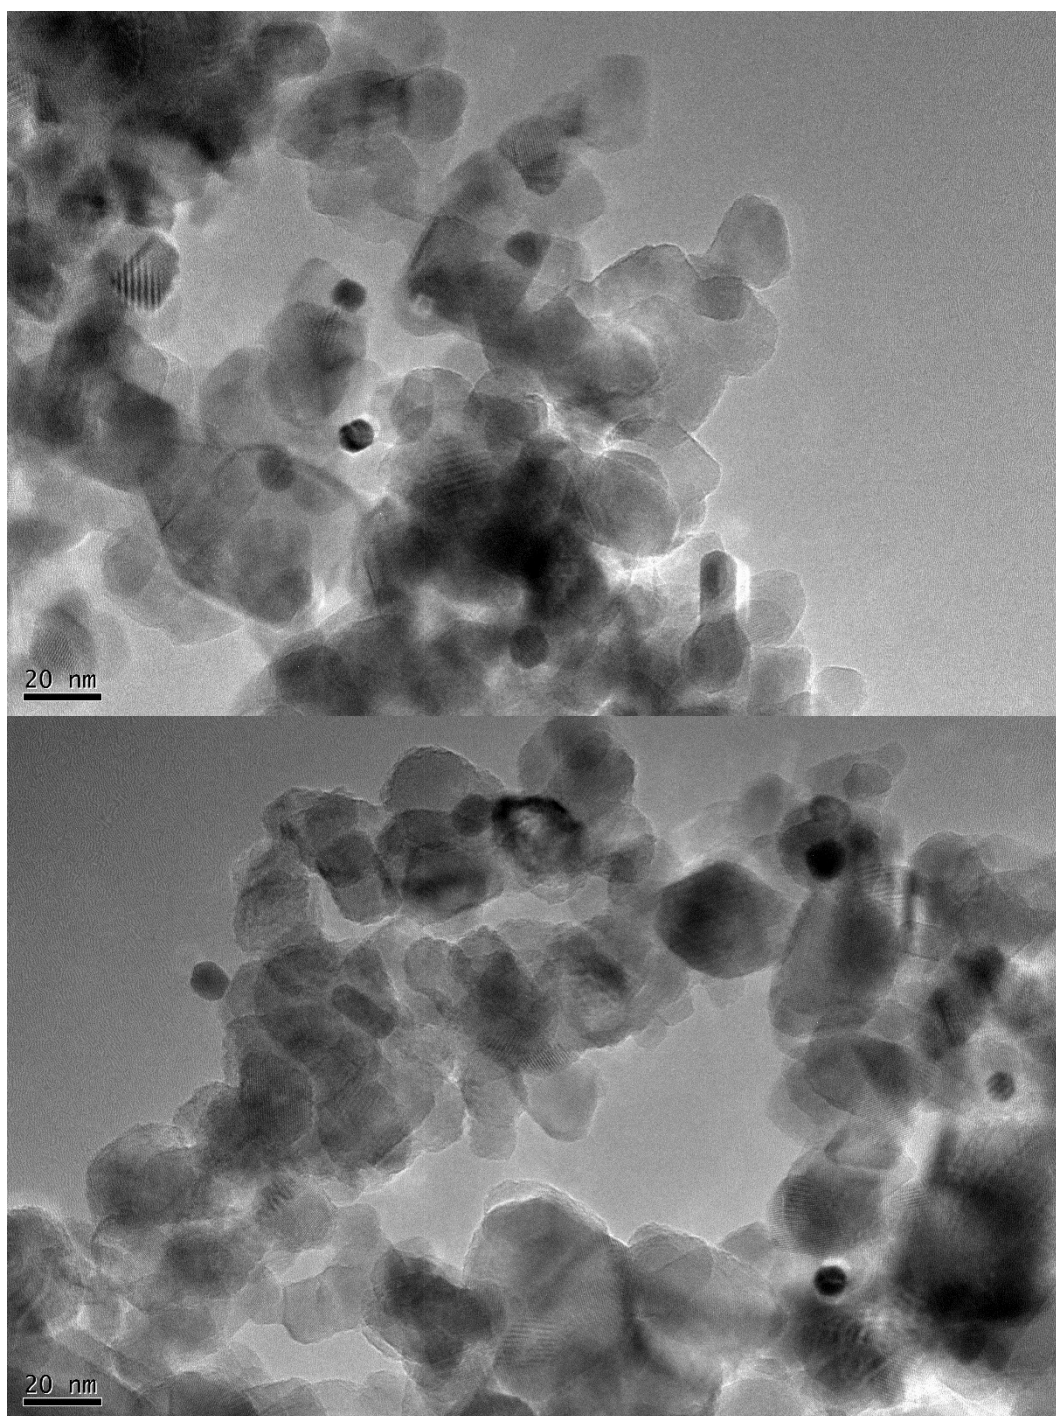

**Fig. S6.** TEM image of the Pt/TiO<sub>2</sub>-10.8 nm.

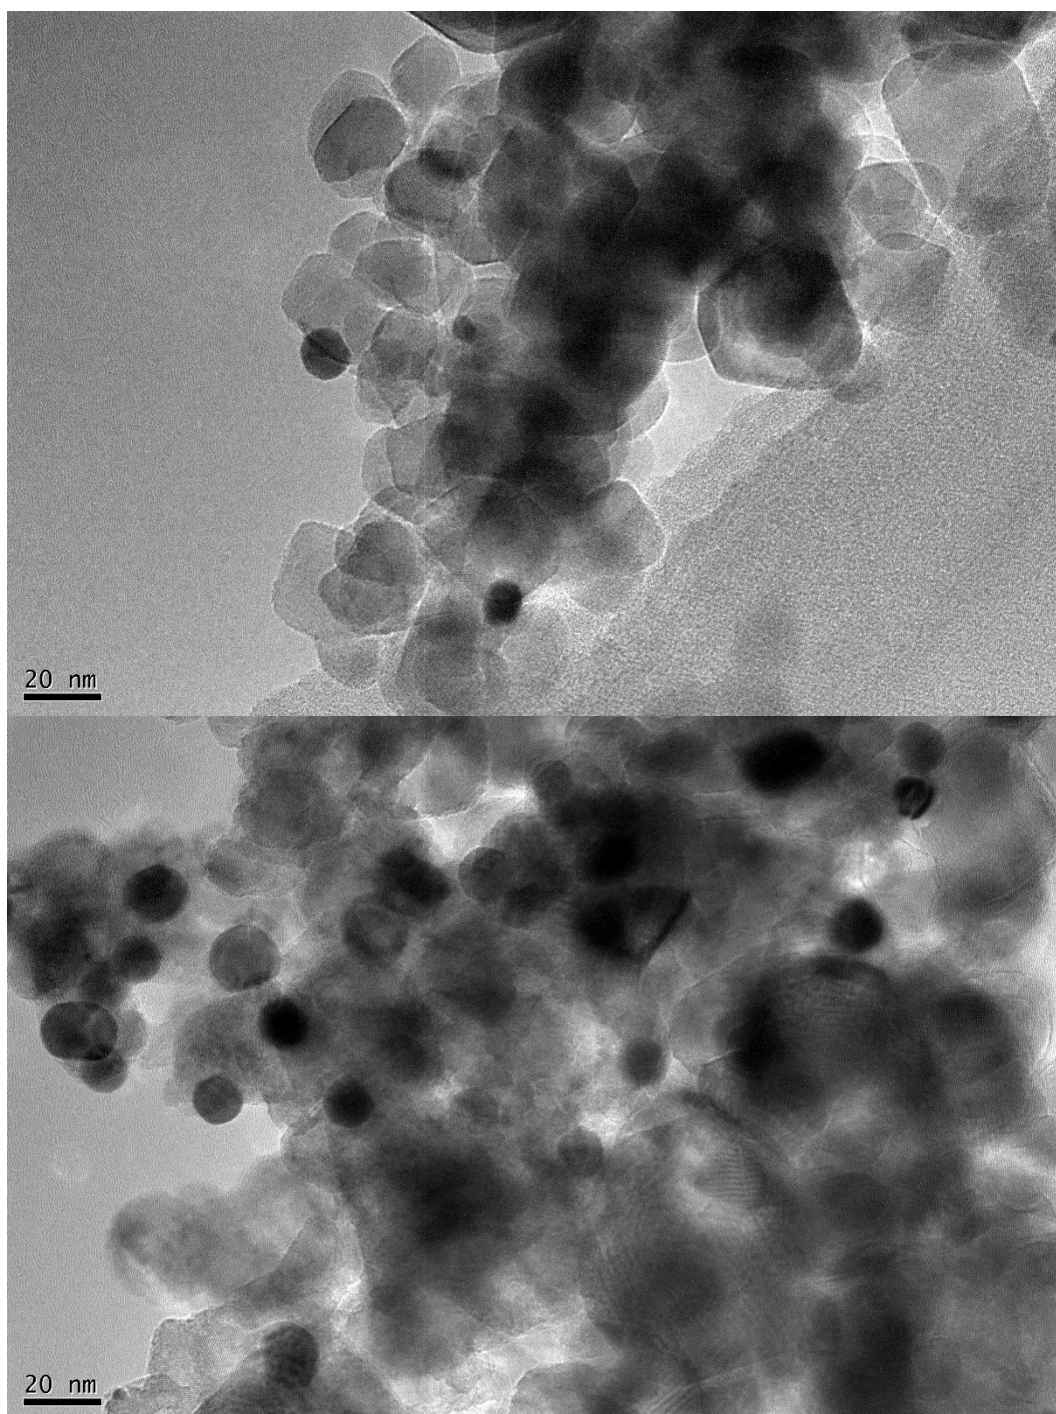

**Fig. S7.** TEM images of the Pt/TiO<sub>2</sub>-12.4 nm.

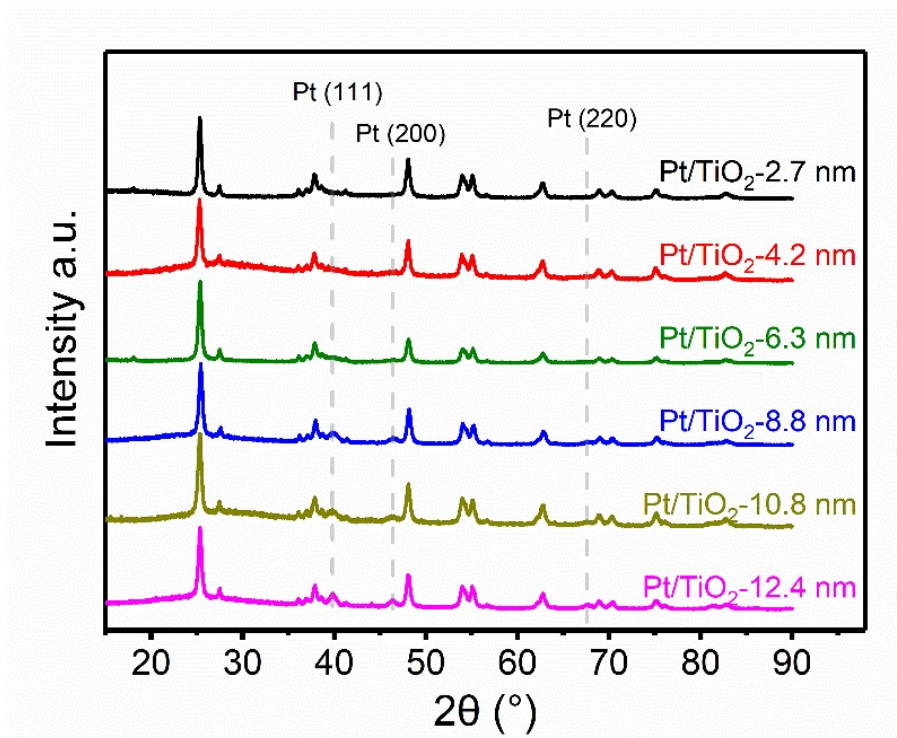

Fig. S8. XRD patterns for Pt/TiO<sub>2</sub> catalysts with different Pt NPs sizes.

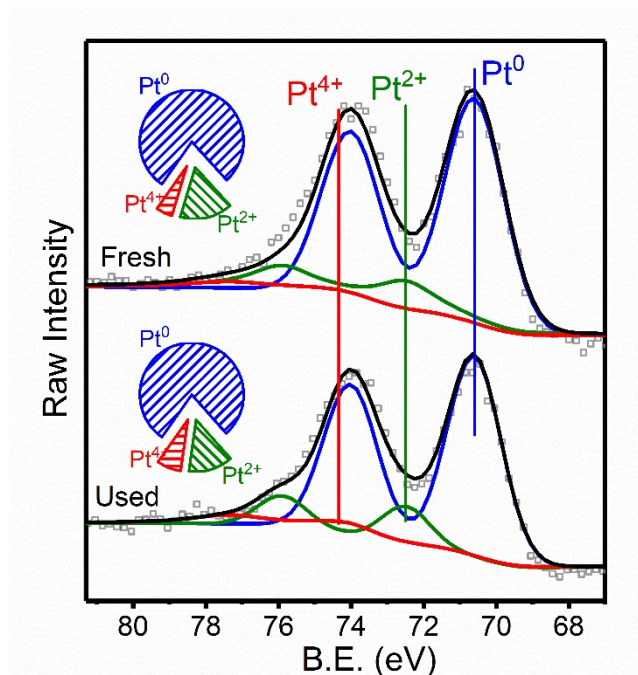

Fig. S9 XPS of Pt 4f for Pt/TiO<sub>2</sub>-4.2 nm catalyst. Condition: Pre-treatment in H<sub>2</sub> under 300 °C for 3 h, WHSV = 120,000 mL g<sub>cat</sub><sup>-1</sup> h<sup>-1</sup> (Fresh); then no-load test in synthetic air only under 160 °C for 3 h, WHSV = 120,000 mL g<sub>cat</sub><sup>-1</sup> h<sup>-1</sup> (Used).

**This ESI replaces the original version published on 10 November 2022**



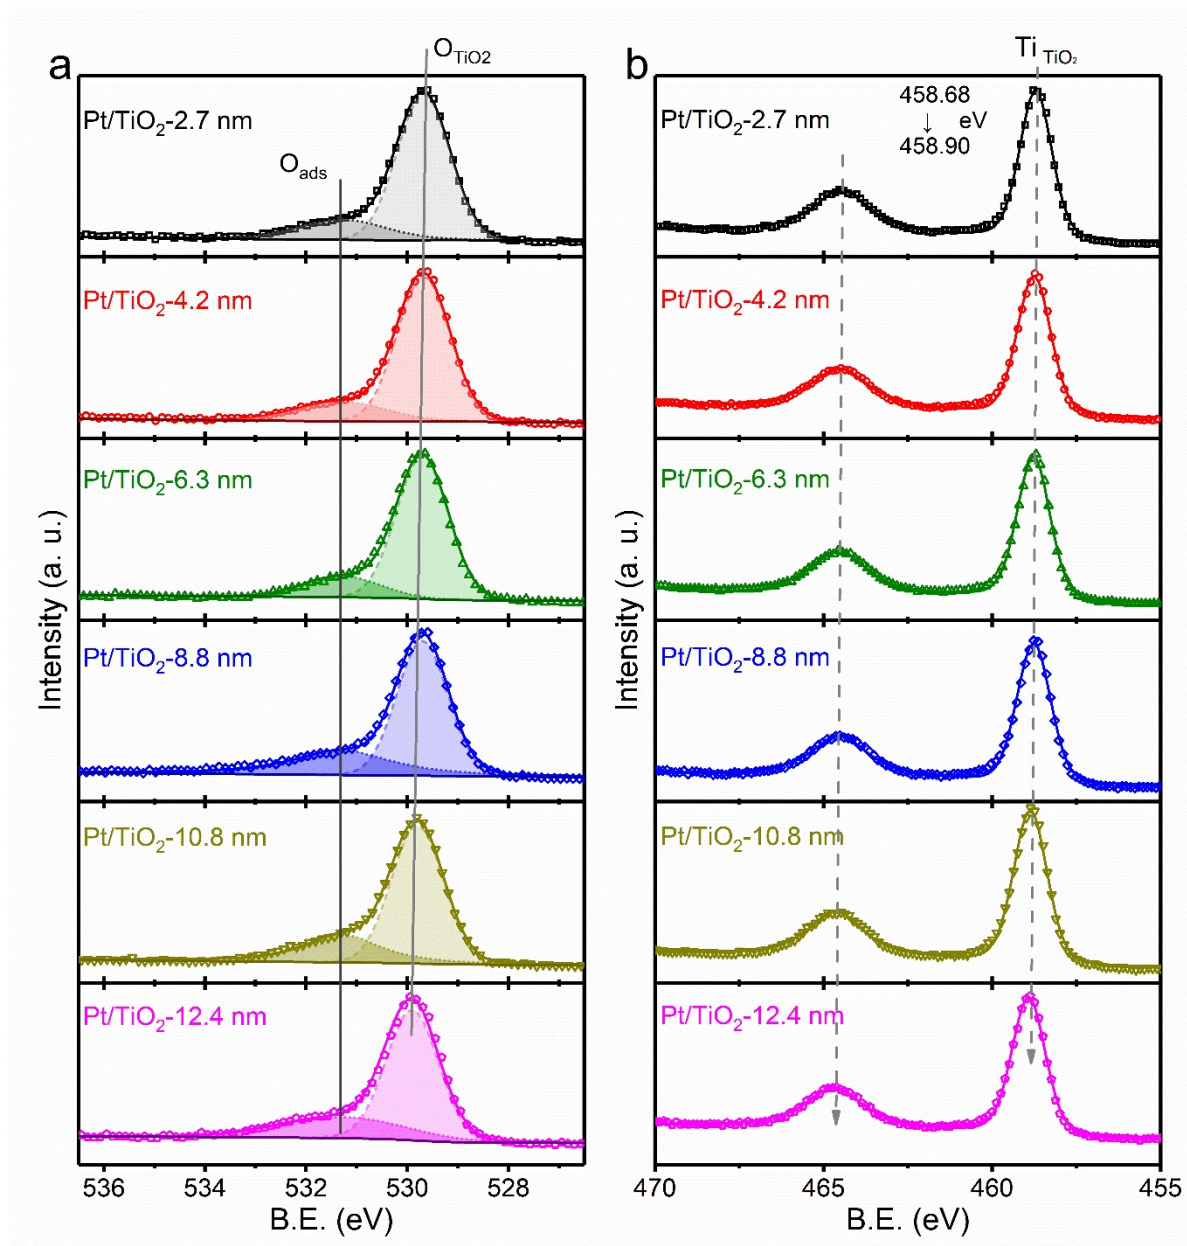

**Fig. S10.** XPS of (a) O 1s and (b) Ti 2p for catalysts with different Pt NP sizes. Condition: Pre-treatment in H<sub>2</sub> under 300 °C for 3 h, WHSV = 120,000 mL g<sub>cat</sub><sup>-1</sup> h<sup>-1</sup>.

Table S1 Elemental analysis<sup>a)</sup> result of Pt/TiO<sub>2</sub>-2.6 nm before and after catalytic performance test at stable stage for 140 °C to 150 °C

| Name                                 | Weight (mg) | Content (%)                      | C/N ratio |
|--------------------------------------|-------------|----------------------------------|-----------|
| Pt/TiO <sub>2</sub> -2.7 nm - before | 4.9240      | N: 0.009<br>C: 1.274<br>H: 1.989 | 148.4     |
| Pt/TiO <sub>2</sub> -2.7 nm - after  | 4.4660      | N: 0.004<br>C: 3.220<br>H: 1.728 | 726.1     |

<sup>a)</sup> Elemental analysis was carried out with varioEL III Elementar under CHN mode. The sample was all mixed with ~3 mg combustion-supporting agents for analysis.

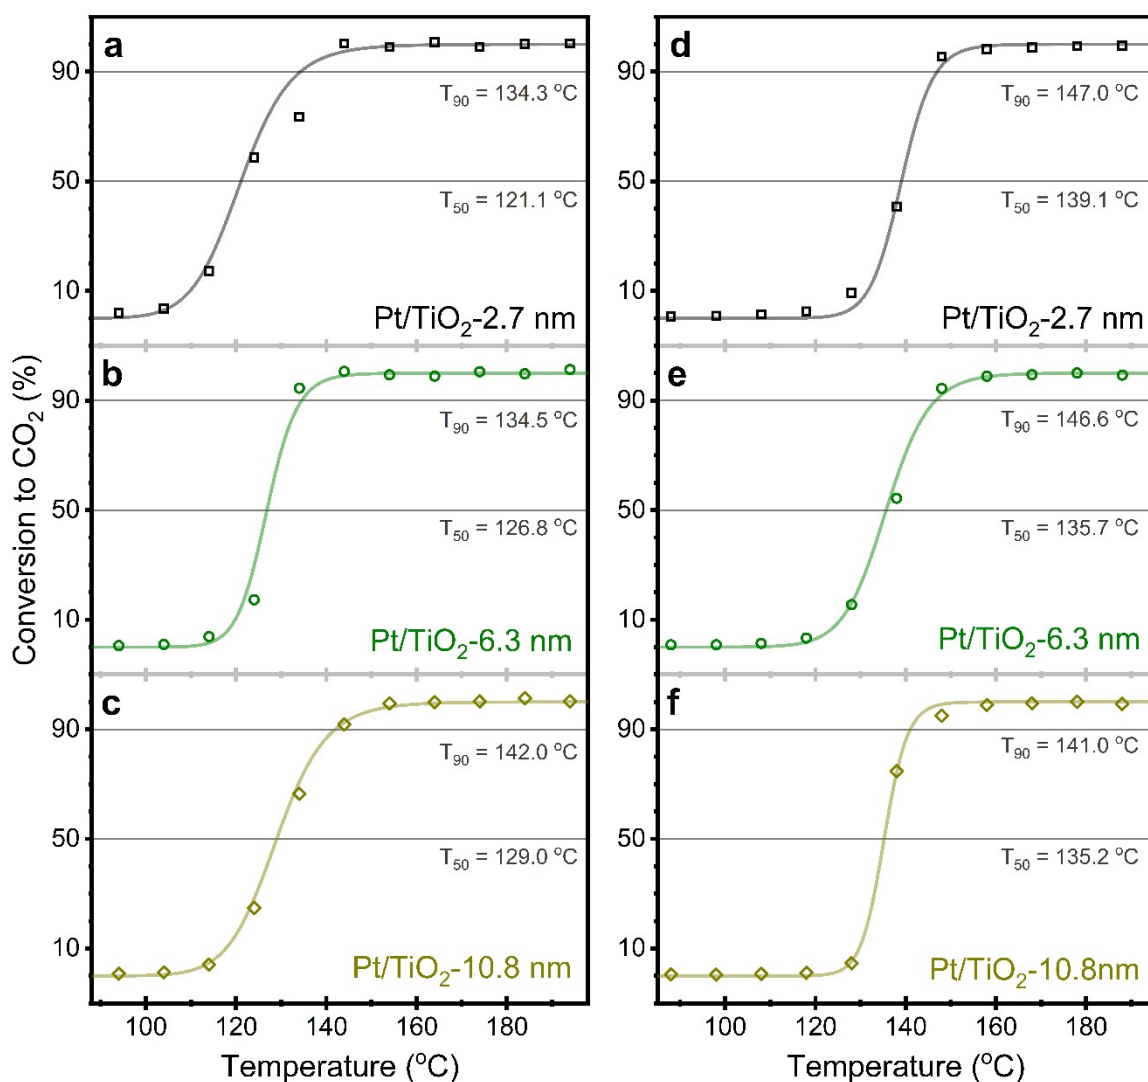

**Fig. S11.** Toluene light-off curve from 50 °C to 300 °C (1 °C/min) (a-c) without and (d-f) with 5 vol.% water stream. The CO<sub>2</sub> selectivity for all the reactions is higher than 99.5%.

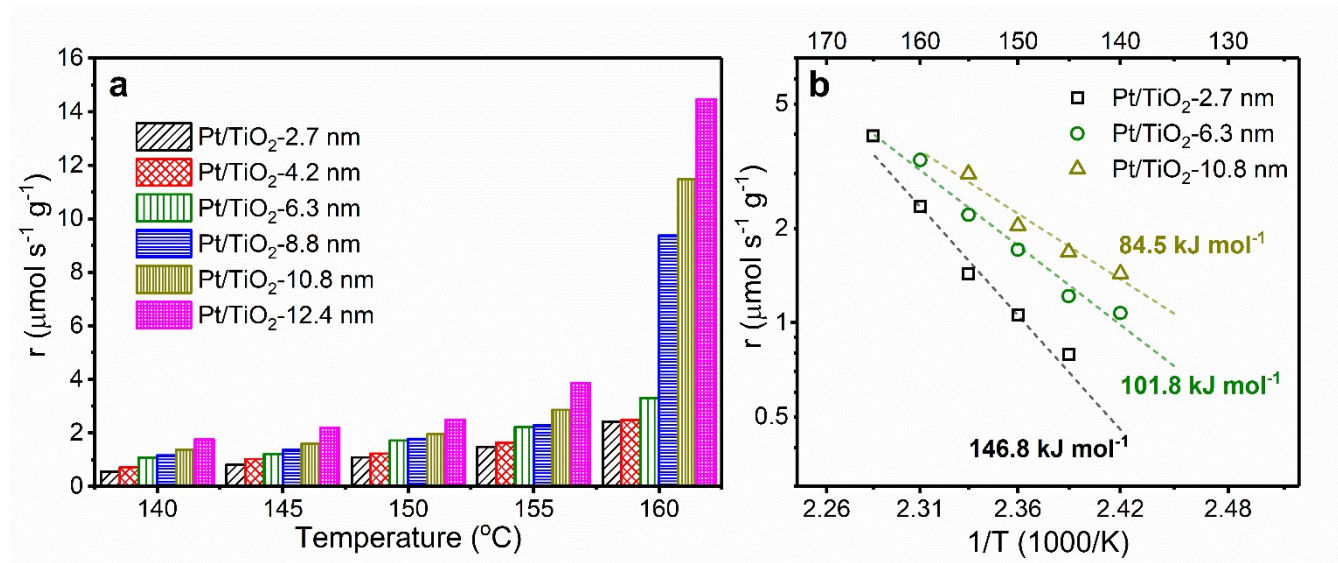

**Fig. S12.** (d) Reaction rate and (e) Arrhenius plots under steady-state (average of conversion in 150 min after 150 min of stabilization) of Pt/TiO<sub>2</sub> catalysts with different Pt sizes towards the complete oxidation of toluene with 5 vol.% water. The CO<sub>2</sub> selectivity for all the reactions is higher than 99.5%.

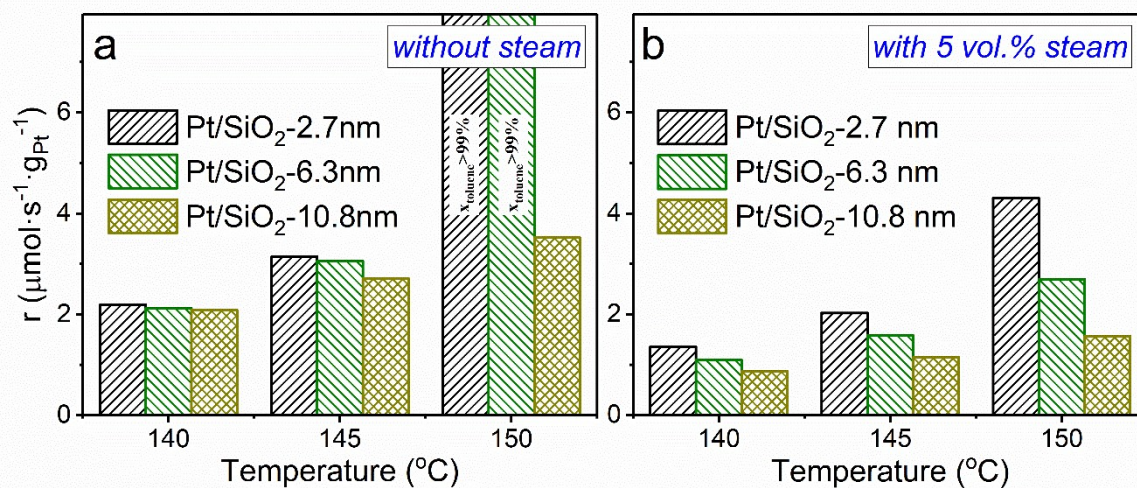

**Fig. S13.** Conversion and reaction rates (inset) of Pt/SiO<sub>2</sub> with different Pt sizes towards complete oxidation of toluene (a) without and (b) with 5 vol.% steam. The conversion of toluene on Pt/SiO<sub>2</sub>-2.7 nm and Pt/SiO<sub>2</sub>-6.3 nm is >99 % at 160  $^{\circ}\text{C}$ , thus it is hard to compare their reaction rates under such conditions.

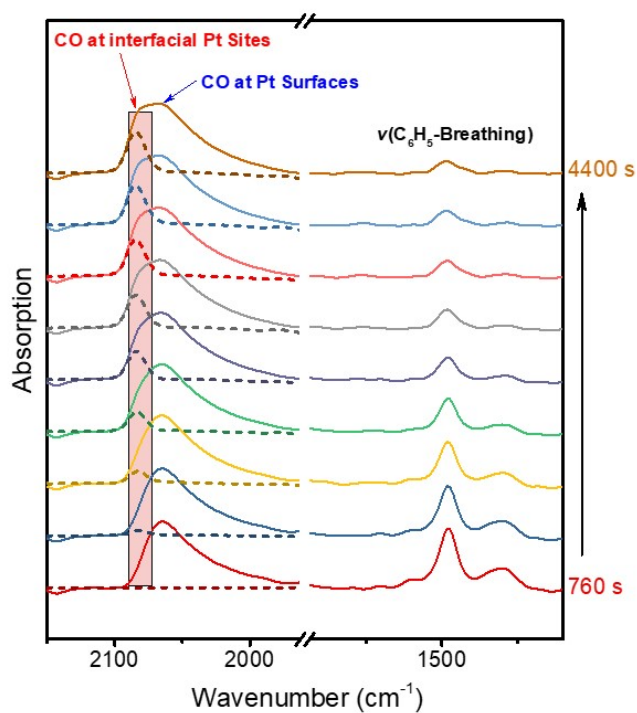

**Fig. S14.** *In situ* DRIFT spectra of CO adsorption at Pt/TiO<sub>2</sub>-4.2 nm. CO adsorption was performed on the same catalyst just after toluene adsorption. The solid lines use the spectra at 0 s as the background, while the dashed lines use the spectra at 760 s as the background.

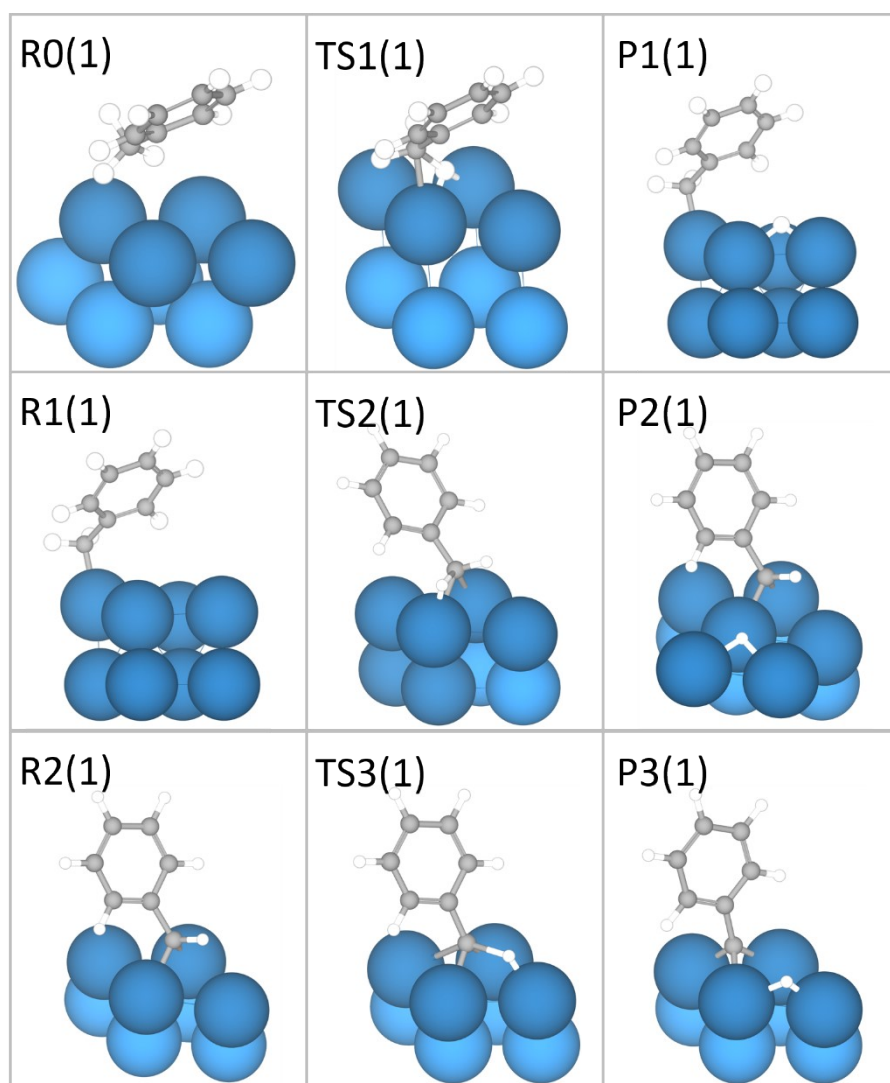

**Fig. S15.** The optimized structures of reactants, transition states and products for toluene dehydrogenation on Pt surface without OH species.

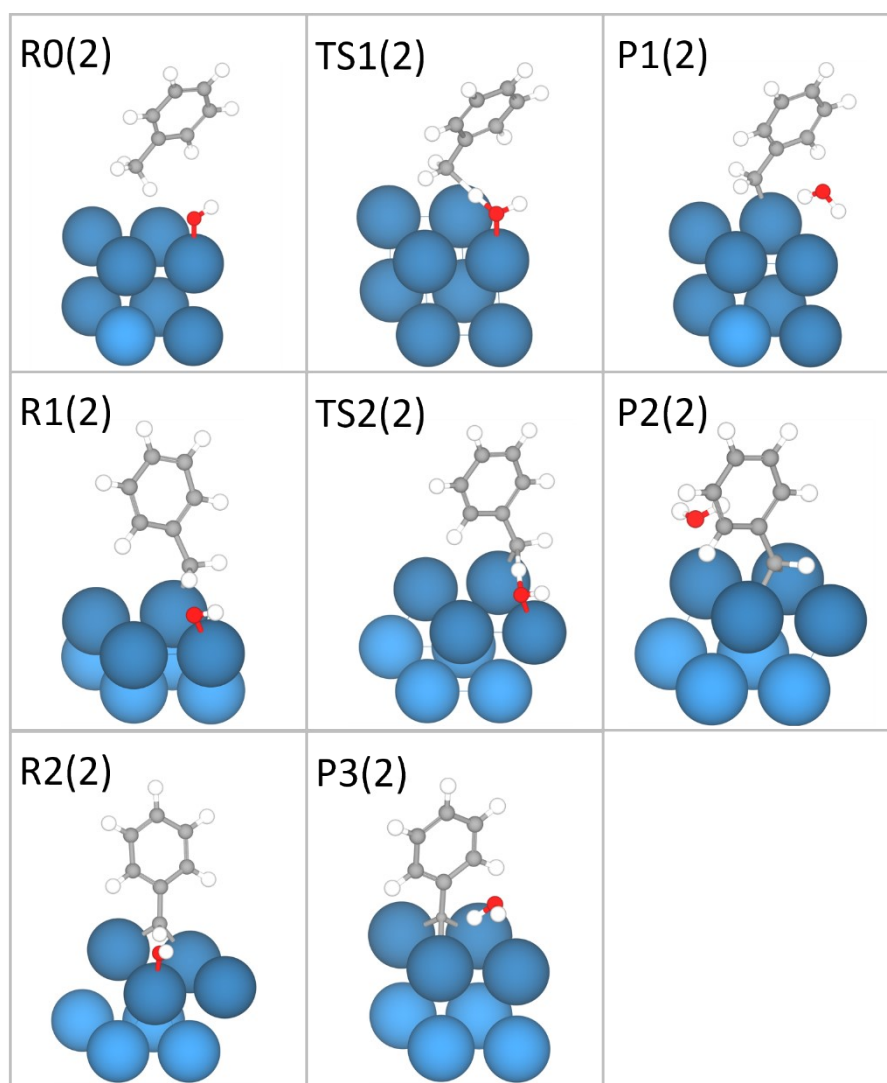

**Fig. S16.** The optimized structures of reactants, transition states and products for toluene dehydrogenation on Pt surface with an adjacent OH.
